# Supplementary material
Source: MDPI journal article supplement (https://www.mdpi.com/2673-8112/2/6/55)
Supplement: s1 [file s1]

## Supplementary Materials

**Table S1.** The sequences of siRNA used in this study.

| Gene name          | siRNA sequence (sense) (5'–3') | siRNA sequence (anti-sense) (5'–3') |
|--------------------|--------------------------------|-------------------------------------|
| siDDX21-1          | CCCUUUGAUUGAGAAACUUTT          | AAGUUUCUCAAUCAAGGGTT                |
| siDDX21-2          | GGACACCAGGUCGUUAUAATT          | UUAUACGACCUGGUGUCCTT                |
| siDDX21-3          | GCAACUGGGUGAGGAUAUUTT          | AAUAUCCUCACCCAGUUGCTT               |
| siNegative control | ACGUGACACGUUCGGAGAATT          | UUCUCCGAACGUGUCACGUTT               |

**Table S2.** The primer sequences for qRT-PCR.

| Gene name  | Forward primer sequence (5'–3') | Reverse primer sequence (5'–3') |
|------------|---------------------------------|---------------------------------|
| PRRSV-nsp9 | ACCCTAGGACCTGTGAAC              | GGCGAGTAACTTAGGAGATG            |
| pDDX21     | CTTCTCAAAGCCCGTGGAGT            | GTCTTCCCAGTTCCTGTCCG            |
| pGAPDH     | CTTCCTGGGCATGGAGTCC             | GGCGCGATGATCTTGATCTTC           |
| hDDX21     | AAACTCCGTAGTGACGCTGG            | TCAACTTCAGAAGGCTCTGCTT          |
| hGAPDH     | TCATGACCACAGTCCATGC             | GGATGACCTTGCCCACAGCC            |
| mDDX21     | TCATCAAGGACGCACTATCATCT         | CCTTTCAGGGTGATTTCCCTTT          |
| mGAPDH     | TCATGACCACAGTCCATGCC            | GGATGACCTTGCCCACAGCC            |
